# Supplementary material
Source: ML conference proceedings conference paper supplement (https://openreview.net/forum?id=TsBDfe8Ra5)
Supplement: supplementary_material [file attachment]

---

# Appendix to “FreCaS: Efficient Higher-Resolution Image Generation via Frequency-aware Cascaded Sampling”

In this appendix, we provide the following materials:

- A Details of timestep shifting in the transition process (referring to Sec. 3.2 in the main paper);
- B The detailed settings of FreCaS on  $\times 4$  and  $\times 16$  generation for SD2.1, SDXL and SD3 (referring to Sec. 4.1 in the main paper);
- C [Results of user studies and non-reference image quality assessment \(NR-IQA\)](#) (referring to Sec. 4.1 in the main paper);
- D [Comparison with training-based methods and super-resolution methods](#) (referring to Sec. 4.2 in the main paper);
- E [More visual results and visual comparisons](#) (referring to Sec. 4.2 in the main paper);
- F Experimental results of generation of SD3 (referring to Sec. 4.3 in the main paper);
- G [Ablation studies on individual components of FreCaS and inference schedule](#) (referring to Sec. 4.4 in the main paper).

## A SHIFTING TIMESTEP IN THE TRANSITION PROCESS

As mentioned in Sec. 3.2 of the main paper, FreCaS employs a five-step transition process to transform the last latent in the current stage  $z_L^{s_{i-1}}$  to the first latent in the next stage  $z_F^{s_i}$ . In addition to changing the resolution, we adjust the timestep from  $L$  to  $F$  to ensure that the signal-to-noise ratio (SNR) (Kingma et al., 2021) could be a constant in the transition process. Given a state  $z_t = \sqrt{\alpha_t}z_0 + \sqrt{1 - \alpha_t}\epsilon$  at timestep  $t$ , the SNR is defined as  $\text{SNR}(z_t) = \frac{\alpha_t}{1 - \alpha_t}$ , where  $\alpha_1, \dots, \alpha_T$  represent the noise schedule, and  $\epsilon$  is Gaussian noise. It has been found (Hoogeboom et al., 2023; Chen, 2023) that the SNR maintains a consistent ratio across resolutions for diffusion models using the same noise schedule:

$$\text{SNR}(z_t^s) = \text{SNR}(z_t^{\hat{s}}) \cdot \left(\frac{s}{\hat{s}}\right)^\gamma,$$

where  $s$  and  $\hat{s}$  denote different resolutions. The value of  $\gamma$  is typically set to 2.

Teng et al. (2024) and Gu et al. (2023) proposed to redesign the noise schedule to keep SNR consistent when changing the resolutions of intermediate states. Since the pre-trained diffusion models have fixed noise schedules, in this paper we adjust the timestep, instead of the noise schedule, to ensure consistent SNR between  $z_L^{s_{i-1}}$  and  $z_F^{s_i}$ :

$$\text{SNR}(z_L^{s_{i-1}}) = \text{SNR}(z_F^{s_i}) \Rightarrow F = \alpha^{-1} \left( \frac{\left(\frac{s_{i-1}}{s_i}\right)^\gamma \cdot \alpha_L}{1 + \left(\left(\frac{s_{i-1}}{s_i}\right)^\gamma - 1\right) \cdot \alpha_L} \right), \quad (1)$$

where  $\alpha^{-1}$  is the inverse function of  $\alpha_t$ . Proper adjustment of  $\gamma$  can yield additional improvements.

Besides, SD3 (Esser et al., 2024) employs a similar formula to shift the timestep when varying resolutions:

$$F = \frac{\sqrt{\frac{s_i}{s_{i-1}}} \cdot L}{1 + \left(\sqrt{\frac{s_i}{s_{i-1}}} - 1\right) \cdot L}. \quad (2)$$

## B EXPERIMENTAL SETTING DETAILS

The experimental setting details of our FreCaS are listed in Table 1.

## C RESULTS OF USER STUDIES AND NR-IQA METRICS

We have (a) conducted user studies and (b) employed non-reference image quality assessment (NR-IQA) metrics to further assess the performance of FreCaS and its competing methods.

Table 1: Detailed settings of FreCaS on the experiments.  $N$  denotes the count of additional stages. “Steps” presents the sampling steps in each stage.  $L$  presents the timestep of last latent in each stage except for the final one.  $\gamma$  denotes the SNR ratio in the transition process.  $w_l$ ,  $w_h$  and  $w_c$  are the hyper-parameters of the proposed FA-CFG and CA-maps re-utilization.

|       |             | $N + 1$ | Steps    | $L$     | $\gamma$ | $w_l$ | $w_h$ | $w_c$ |
|-------|-------------|---------|----------|---------|----------|-------|-------|-------|
| SD2.1 | $\times 4$  | 2       | 40,10    | 100     | 3.0      | 7.5   | 45.0  | 0.6   |
|       | $\times 16$ | 3       | 30,10,10 | 200,200 | 3.0      | 7.5   | 35.0  | 0.4   |
| SDXL  | $\times 4$  | 2       | 40,10    | 200     | 1.5      | 7.5   | 35.0  | 0.6   |
|       | $\times 16$ | 3       | 30,5,15  | 400,200 | 2.0      | 7.5   | 35.0  | 0.6   |
| SD3   | $\times 4$  | 2       | 20,8     | 50      | -        | 7.0   | 35.0  | 0.5   |

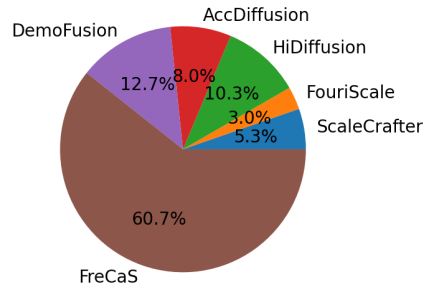

Figure 1: User study results on  $\times 4$  generation of SDXL.

Table 2: NR-IQA metrics on  $\times 4$  and  $\times 16$  generation of SDXL.

| Methods         | $\times 4$         |                   |                  | $\times 16$        |                   |                  |
|-----------------|--------------------|-------------------|------------------|--------------------|-------------------|------------------|
|                 | clipiqa $\uparrow$ | niqe $\downarrow$ | musiq $\uparrow$ | clipiqa $\uparrow$ | niqe $\downarrow$ | musiq $\uparrow$ |
| DirectInference | 0.522              | 4.167             | 53.98            | 0.469              | 4.370             | 29.00            |
| AttnEntropy     | 0.547              | 4.210             | 54.87            | 0.528              | 4.614             | 27.98            |
| ScaleCrafter    | 0.664              | 3.577             | 61.12            | 0.618              | 3.783             | 36.00            |
| FouriScale      | 0.662              | 3.580             | 60.77            | 0.612              | 3.791             | 35.52            |
| HiDiffusion     | <b>0.690</b>       | 4.049             | 61.69            | 0.574              | 7.348             | 36.71            |
| AccDiffusion    | 0.627              | 3.641             | 57.02            | 0.626              | 3.587             | 31.83            |
| DemoFusion      | 0.651              | 3.410             | 58.98            | 0.637              | 3.376             | 33.46            |
| <b>Ours</b>     | 0.668              | <b>3.391</b>      | <b>63.10</b>     | <b>0.646</b>       | <b>3.367</b>      | <b>37.33</b>     |

### C.1 USER STUDIES

For the user studies, we compare FreCaS with ScaleCrafter, FouriScale, HiDiffusion, DemoFusion, and AccDiffusion on  $2048 \times 2048$  image generation using SDXL. We randomly selected 30 prompts and generated one image per method for each prompt, creating 30 sets of images. Ten volunteers participated in the test, and they were asked to select the image with the best details and reasonable semantic layout from each set. The results are shown in Figure 1. We can see that FreCaS significantly outperforms other methods, with 60% votes as the best method. DemoFusion, AccDiffusion, and HiDiffusion perform similarly, with each having about 10% of the votes. In contrast, FouriScale and ScaleCrafter have the fewest votes, about 5% each.

### C.2 NR-IQA METRICS

For the NR-IQA metrics, we employ CLIPIQA (Wang et al., 2023), NIQE (Mittal et al., 2012), and MUSIQ (Ke et al., 2021) on  $\times 4$  and  $\times 16$  image generations with SDXL. The results are presented in

108  
 109  
 110  
 111  
 112  
 113  
 114  
 115  
 116  
 117  
 118  
 119  
 120  
 121  
 122  
 123  
 124  
 125  
 126  
 127  
 128  
 129  
 130  
 131  
 132  
 133  
 134  
 135  
 136  
 137  
 138  
 139  
 140  
 141  
 142  
 143  
 144  
 145  
 146  
 147  
 148  
 149  
 150  
 151  
 152  
 153  
 154  
 155  
 156  
 157  
 158  
 159  
 160  
 161

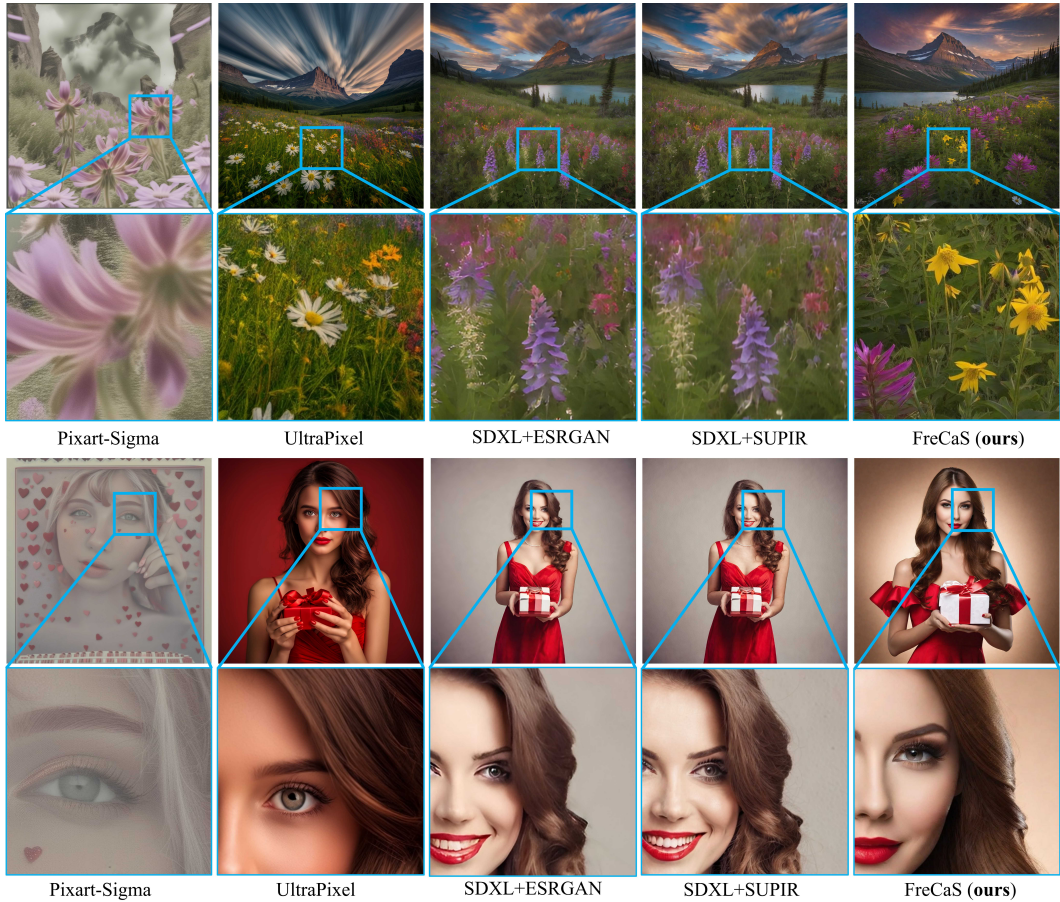

Figure 2: Visual comparison with training-based methods and super-resolution methods on  $\times 4$  generation of SDXL.

Table 2. Our FreCaS consistently outperforms all the other methods. For example, on  $\times 4$  generation, FreCaS achieves a CLIPQA score of 0.668, a NIQE score of 3.391, and a MUSIQ score of 63.10, compared to 0.651, 3.410, and 58.98 for DemoFusion. On  $\times 16$  generation, FreCaS achieved a CLIPQA score of 0.646, a NIQE score of 3.367, and a MUSIQ score of 37.33, compared to 0.626, 3.587, and 31.83 for AccuDiffusion. Notably, FreCaS only lags behind HiDiffusion on the CLIPQA metric in  $\times 4$  image generation.

#### D COMPARISON WITH TRAINING-BASED METHODS AND SUPER-RESOLUTION METHODS

We conducted additional experiments comparing FreCaS with training-based methods (Pixart-Sigma (Chen et al., 2024) and UltraPixel (Ren et al., 2024)) and super-resolution methods (ESRGAN (Wang et al., 2021) and SUPIR (Yu et al., 2024)). To ensure fair comparisons, we set the model precision to fp16 (bf16 for UltraPixel, as recommended by the authors) and use the DDIM sampler for diffusion-based methods. For Pixart-Sigma, we can only report its results for  $2048 \times 2048$  image generation since its 4K model is not available. The quantitative results are summarized in Table 3.

From Table 3, we can see that FreCaS outperforms Pixart-Sigma and UltraPixel in most metrics. For example, FreCaS achieves an FID score of 16.48 and an IS score of 17.18, compared to 26.1 and 14.44 of Pixart-Sigma, and 25.56 and 17.11 of UltraPixel on the  $\times 4$  image generation task. This is because Pixart-Sigma, as acknowledged by the authors, heavily relies on the advanced samplers (see <https://github.com/PixArt-alpha/PixArt-sigma/issues/65>) so that the results are not very stable.

Table 3: Comparison with training-based methods and super-resolution methods on  $\times 4$  and  $\times 16$  generation of SDXL.

|             | Methods      | FID $\downarrow$ | FID $_p\downarrow$ | IS $\uparrow$ | IS $_p\uparrow$ | CLIP SCORE $\uparrow$ | Latency(s) $\downarrow$ |
|-------------|--------------|------------------|--------------------|---------------|-----------------|-----------------------|-------------------------|
| $\times 4$  | Pixart-Sigma | 26.11            | 38.58              | 14.44         | 14.45           | 28.10                 | 71.45                   |
|             | UltraPixel   | 25.56            | 19.95              | 17.11         | 17.10           | 33.17                 | 41.70                   |
|             | SDXL+ESRGAN  | 13.03            | 18.10              | 17.30         | 16.58           | 34.13                 | 6.36                    |
|             | SDXL+SUPIR   | 12.08            | 17.31              | 17.57         | 17.12           | 34.16                 | 105.5                   |
|             | <b>Ours</b>  | 16.48            | 17.91              | 17.18         | 17.31           | 33.28                 | 13.84                   |
| $\times 16$ | UltraPixel   | 51.43            | 45.88              | 12.48         | 13.73           | 33.07                 | 162.4                   |
|             | SDXL+ESRGAN  | 45.86            | 43.10              | 12.94         | 13.48           | 33.44                 | 7.25                    |
|             | SDXL+SUPIR   | 43.94            | 39.35              | 13.22         | 14.37           | 33.49                 | 512.4                   |
|             | <b>Ours</b>  | 42.75            | 39.82              | 12.68         | 14.16           | 33.03                 | 85.87                   |

UltraPixel, while achieving comparable performance to DemoFusion, still lags behind FreCaS in most metrics. Besides, the two methods are much slower than our FreCaS.

For SR-based methods, FreCaS may have lower FID, IS, and CLIP scores than SDXL+ESRGAN. This is because SR methods are designed to strictly adhere to low-resolution inputs, while these metrics (FID, IS, and CLIP) evaluate images by downsampling them to low resolution, which cannot well reflect the quality of generated high-resolution images. However, FreCaS significantly outperforms SDXL+ESRGAN in FID $_p$  and IS $_p$ . Specifically, FreCaS achieves an FID $_p$  score of 39.82 and an IS $_p$  score of 14.16, compared to 43.10 and 13.48 of SDXL+ESRGAN on  $\times 16$  image generation. This indicates its superior ability to generate high-resolution local details. This observation is consistent with the findings in the DemoFusion paper. Additionally, SDXL+SUPIR outperforms FreCaS in FID $_p$  and IS $_p$ , but at the cost of much longer inference latency (85.87 seconds for FreCaS vs. 512.4 seconds for SDXL+SUPIR on  $\times 16$  image generations).

We have provided some visual comparisons in Figure 2. One can see that FreCaS demonstrates better visual quality than either training-based or SR-based methods in high-resolution image generation, such as the more vivid and clearer flowers, hairs and the more natural color of lips.

## E MORE VISUAL RESULTS

### E.1 MORE VISUAL RESULTS

Figure 3 illustrates more visual results of FreCaS, including those with varying aspect ratios. From top to bottom, and left to right, the prompts used in examples are: 1. “Beautiful winter wallpapers.” 2. “A regal queen adorned with jewels.” 3. “A majestic phoenix, wings ablaze, rising from ashes, the flames casting a warm glow.” 4. “Lady in Red oil portrait painting won the John Singer Sargent People’s award.” 5. “Star of the day – Actress Evelyn Laye - 1917.” 6. “Photograph - Clouds Over Daicey Pond by Rick Berk.” 7. “little-boy-with-large-bulldog-in-a-garden-france.” 8. “03-Brussels-Maja-Wronska-Travels-Architecture-Paintings.” 9. “Red Fox Pup Print by William H. Mullins.” 10. “Lovely Illustrations Of Cityscapes Inspired By Southeast Asia Malaysian digital illustrator Chong Fei Giap’s illustrations of cityscapes are lovely and inspiring. Fantasy Landscape, Landscape Art, Illustrator, Japon Tokyo, Animation Background, Art Background, Matte Painting, Anime Scenery, Jolie Photo.” 11. “A plate with creamy chicken and vegetables, a side of onion rings, a cup of coffee and a slice of cheesecake.” 12. “Hyper-Realistic Portrait of Redhead Girl Drawn with Bic Pens.”

To further validate the performance of FreCaS in real-world application scenarios, we have provided additional visual results in three categories:

- **Simple scenes.** These images typically contain a single object in a realistic style. We display images of people, animals, landscapes, buildings, and other common objects. The visual results for this group are presented in Figure 4.

216  
217  
218  
219  
220  
221  
222  
223  
224  
225  
226  
227  
228  
229  
230  
231  
232  
233  
234  
235  
236  
237  
238  
239  
240  
241  
242  
243  
244  
245  
246  
247  
248  
249  
250  
251  
252  
253  
254  
255  
256  
257  
258  
259  
260  
261  
262  
263  
264  
265  
266  
267  
268  
269

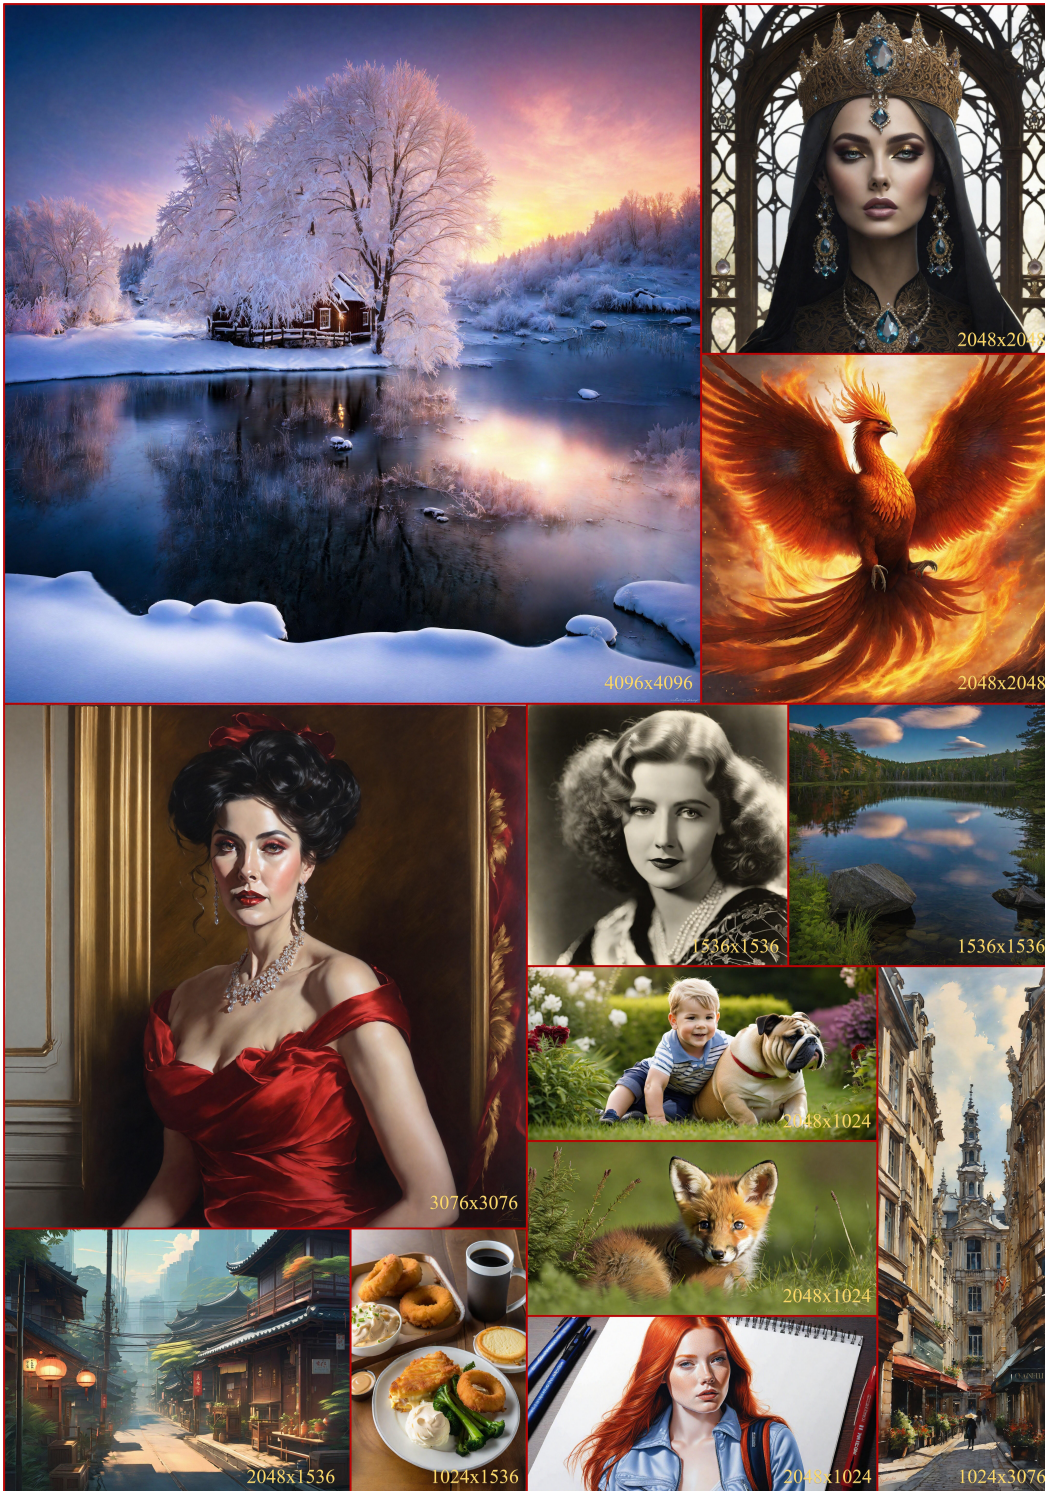

Figure 3: Visual results of FreCaS on SDXL. Please zoom-in for better view.

- **Various styles.** This group showcases images in different artistic styles, including oil painting, pencil sketch, ink wash, watercolor, and poster art. The results are shown in the first two rows of Figure 5.

270  
271  
272  
273  
274  
275  
276  
277  
278  
279  
280  
281  
282  
283  
284  
285  
286  
287  
288  
289  
290  
291  
292  
293  
294  
295  
296  
297  
298  
299  
300  
301  
302  
303  
304  
305  
306  
307  
308  
309  
310  
311  
312  
313  
314  
315  
316  
317  
318  
319  
320  
321  
322  
323

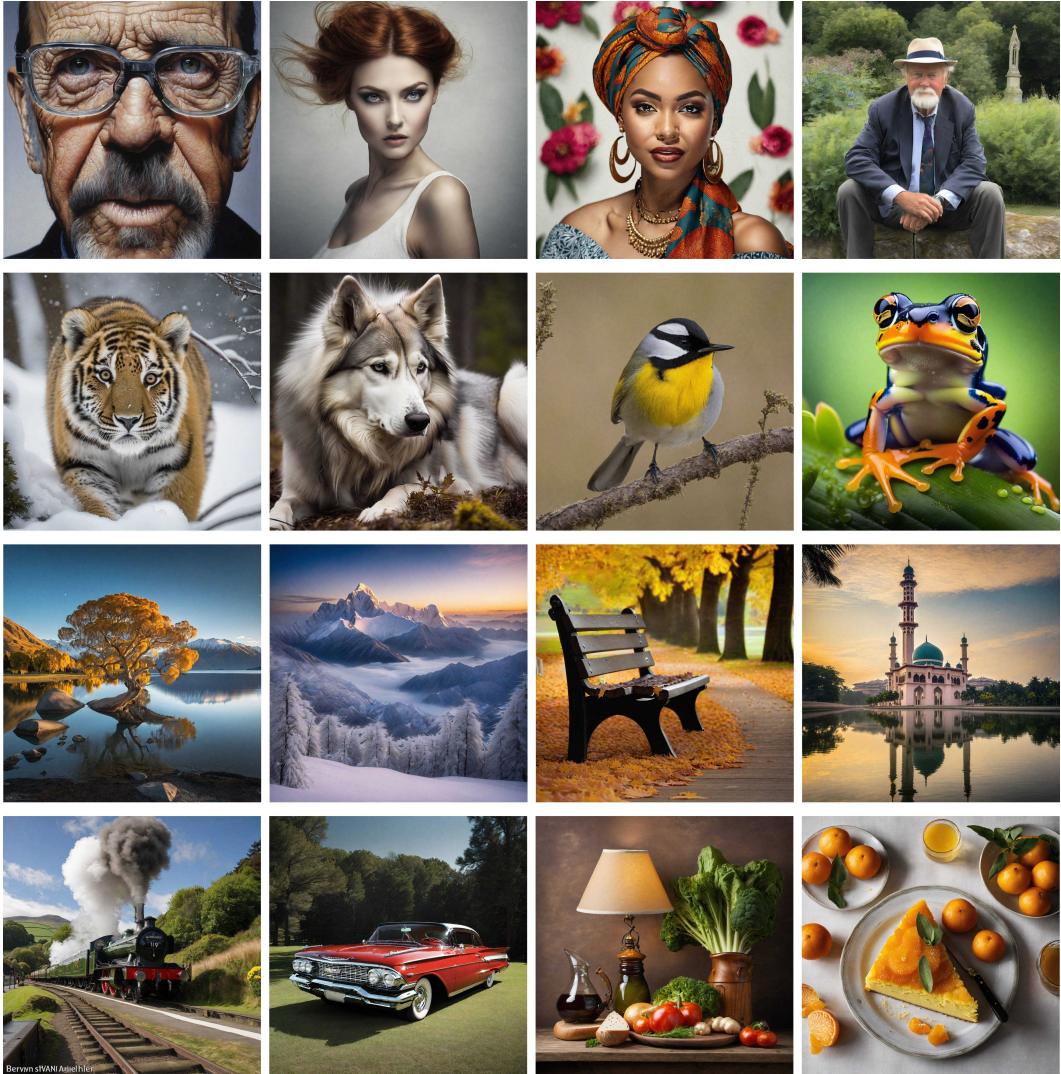

Figure 4: More visual results on simple scenes.

- **Complex scenes.** These images contain multiple objects or have intricate textures. The results are displayed in the bottom two rows of are presented in Figure 5.

From these visual results, it is evident that FreCaS consistently generates high-quality images across various styles and contents, demonstrating the capability of FreCaS in real-world applications.

z

## E.2 MORE VISUAL COMPARISONS

We show more visual comparisons in Figure 6. From top to bottom, the prompts used in the four groups of examples are: 1. “A small den with a couch near the window.” 2. “A painting of a candlestick holder with a candle, several pieces of fruit and a vase, with a gold frame around the painting.” 3. “A noble knight, riding a white horse, the castle gates opening.” 4. “Mystical Landscape Digital Art - Lonely Tree Idyllic Winterlandscape by Melanie Viola.”

We have provided more 4K visual comparisons under realistic scenes in Figure 7. As can be seen, our FreCaS consistently delivers better results in both image layout and semantic details.

324  
325  
326  
327  
328  
329  
330  
331  
332  
333  
334  
335  
336  
337  
338  
339  
340  
341  
342  
343  
344  
345  
346  
347  
348  
349  
350  
351  
352  
353  
354  
355  
356  
357  
358  
359  
360  
361  
362  
363  
364  
365  
366  
367  
368  
369  
370  
371  
372  
373  
374  
375  
376  
377

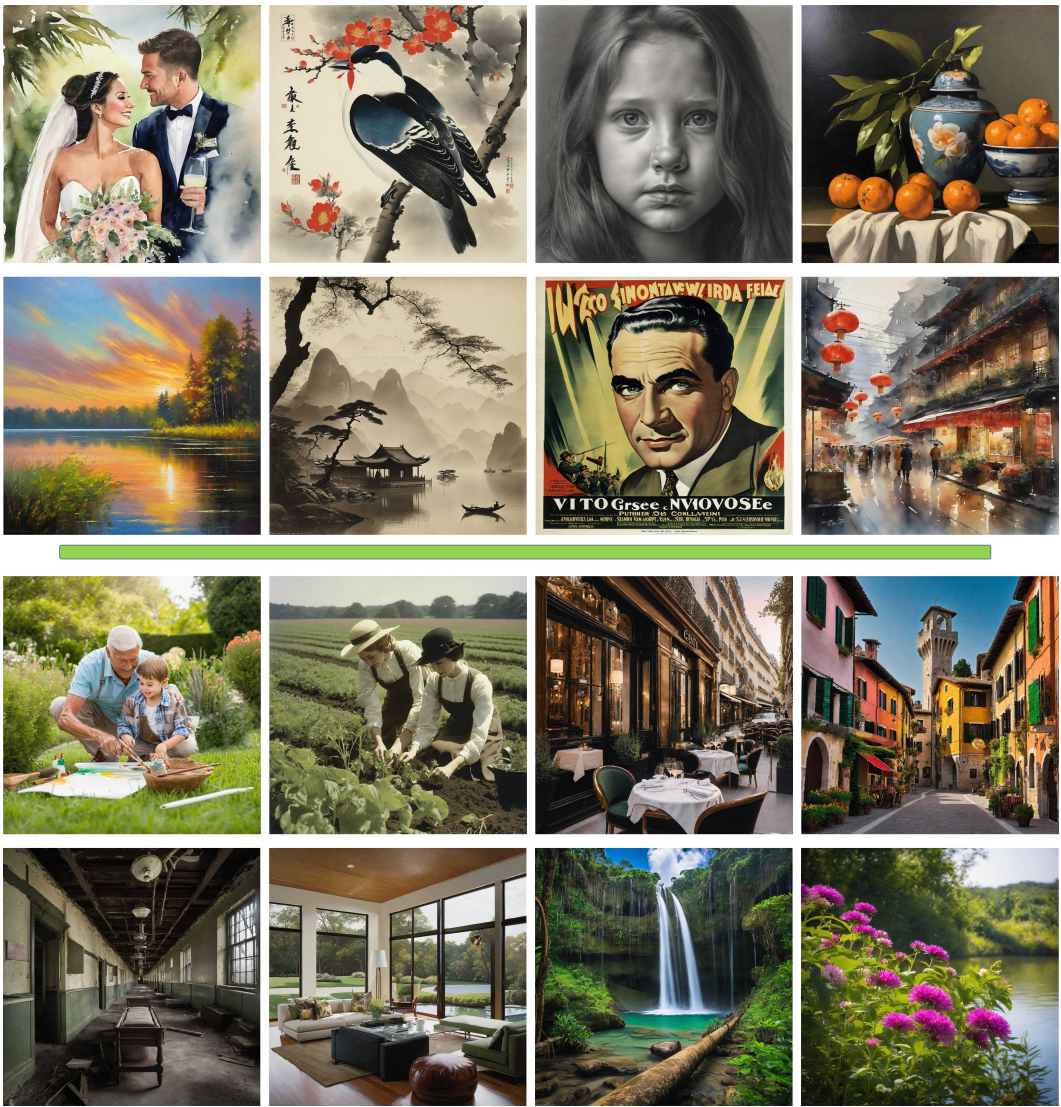

Figure 5: More visual results of various styles (top two rows) and complex scenes (bottom two rows).

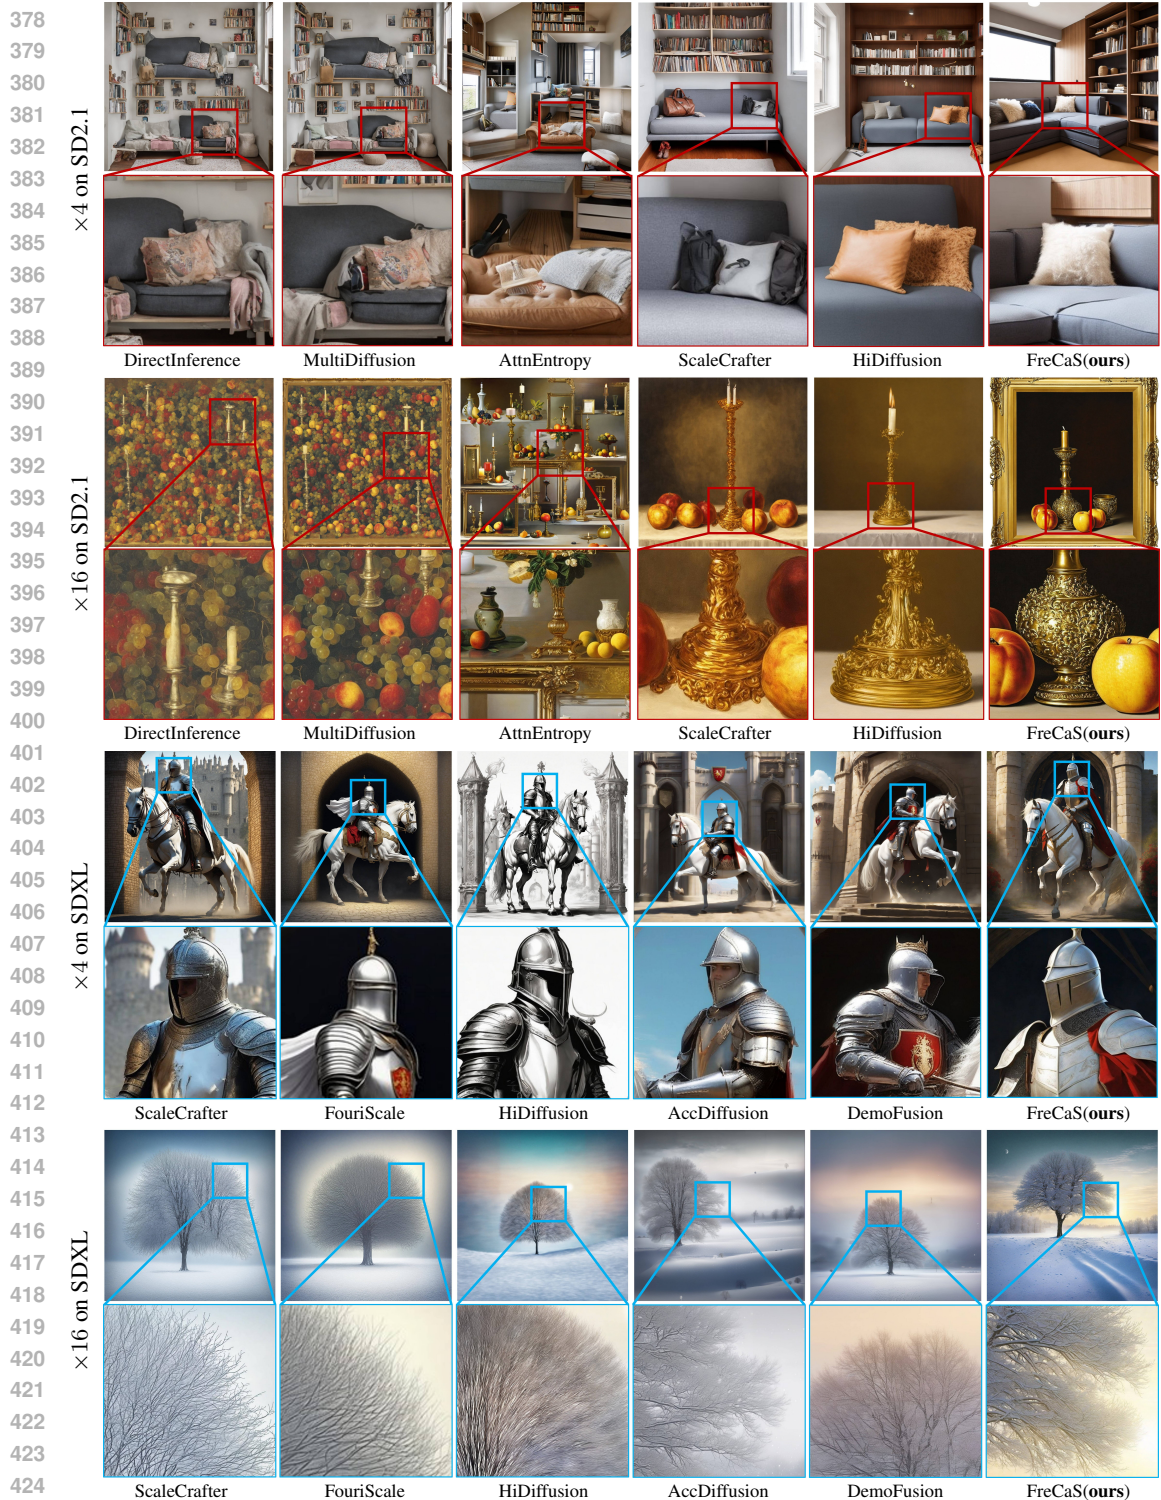

425 Figure 6: Visual comparisons on  $\times 4$  and  $\times 16$  experiments of SD2.1 and SDXL. Please zoom-in for  
426 better view.

427  
428  
429 **F EXPERIMENTS ON SD3**

430 In this section, we present the results of the  $\times 4$  generation experiments on SD3. SD3 employs  
431 a transformer-based denoising network. It eliminates all convolutional layers, thereby preventing



432  
 433  
 434  
 435  
 436  
 437  
 438  
 439  
 440  
 441  
 442  
 443  
 444  
 445  
 446  
 447  
 448  
 449  
 450  
 451  
 452  
 453  
 454  
 455  
 456  
 457  
 458  
 459  
 460  
 461  
 462  
 463  
 464  
 465  
 466  
 467  
 468  
 469  
 470  
 471  
 472  
 473  
 474  
 475  
 476  
 477  
 478  
 479  
 480  
 481  
 482  
 483  
 484  
 485

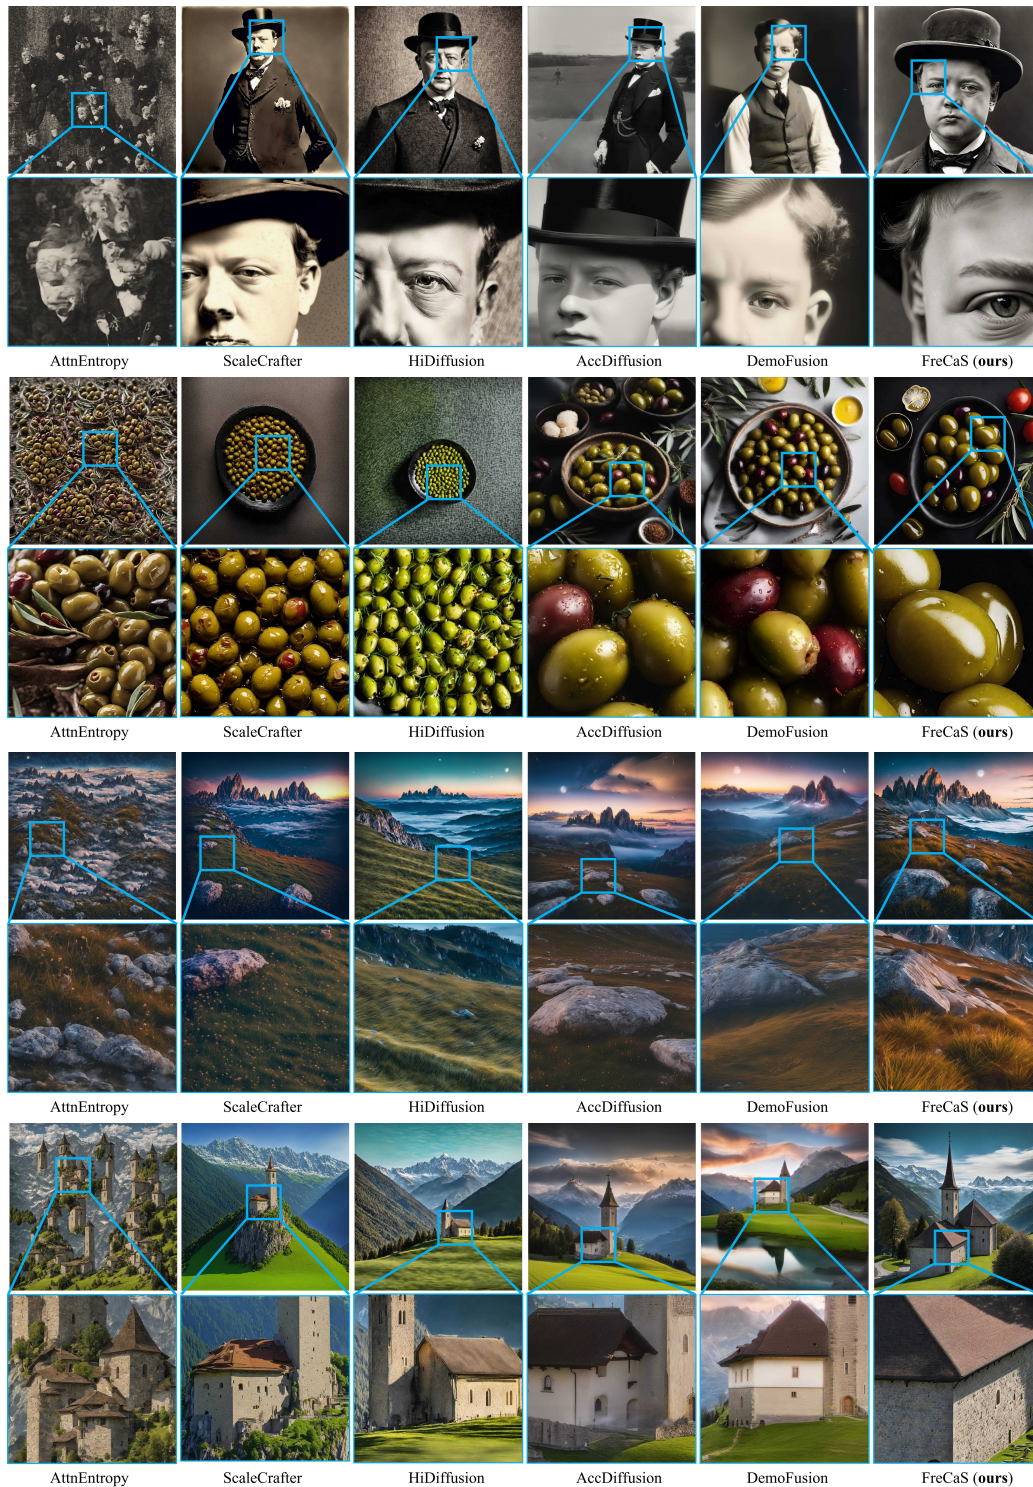

Figure 7: More 4K comparisons in realistic styles. From top to bottom, the prompts are “Young winston churchill.”, “Olive food photography.”, “Mountains in fog at beautiful night. Dreamy landscape with mountain peaks, stones, grass, blue sky with blurred low clouds, stars and moon. Rocks at dusk.” and “Image Church Switzerland towers San Romerio Nature Mountains Scenery Made of stone Tower mountain landscape photography.”

486  
487  
488  
489  
490  
491  
492  
493  
494

Table 4: Experiments on  $\times 4$  generation of SD3.

| Methods         | FID <sub>b</sub> ↓ | FID <sub>p</sub> ↓ | IS↑   | IS <sub>p</sub> ↑ | CLIP SCORE↑ | Latency (s)↓ | SpeedUP↑ |
|-----------------|--------------------|--------------------|-------|-------------------|-------------|--------------|----------|
| DirectInference | 35.68              | 45.35              | 12.52 | 12.60             | 31.45       | 38.53        | 1×       |
| Demodiffusion   | 15.19              | 44.34              | 17.84 | 14.99             | 31.09       | 63.33        | 0.61×    |
| <b>Ours</b>     | 9.76               | 26.62              | 17.83 | 16.72             | 31.17       | 15.94        | 2.42×    |

495  
496  
497  
498  
499  
500  
501  
502  
503  
504  
505  
506  
507  
508  
509  
510  
511  
512  
513  
514  
515  
516  
517  
518

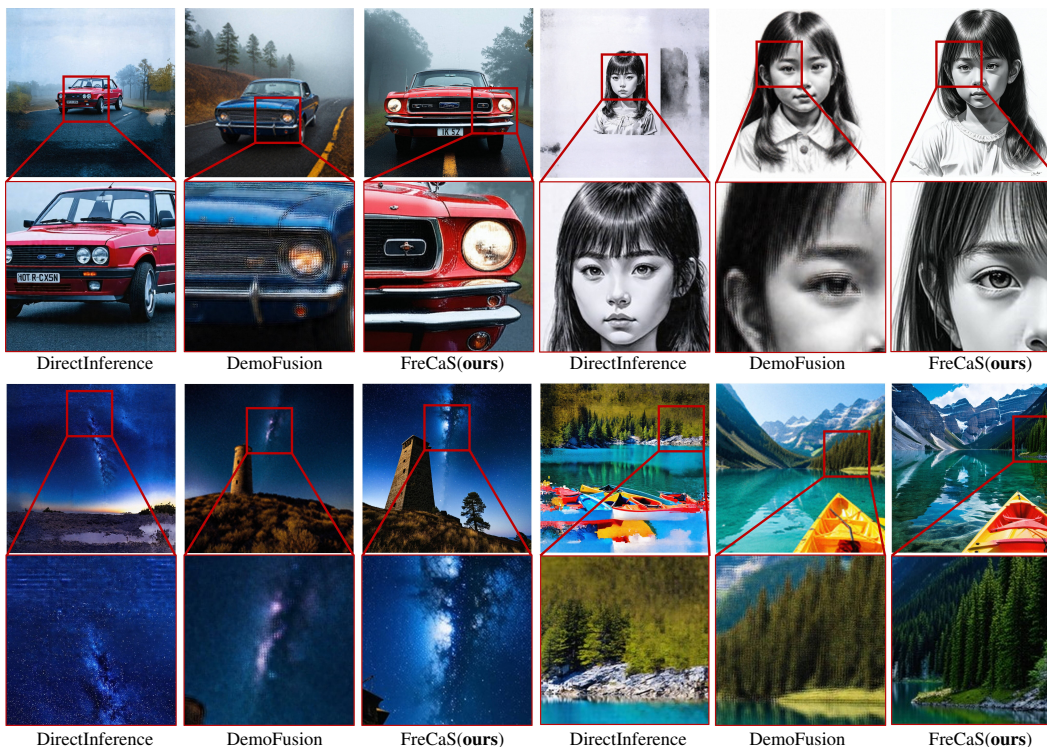

Figure 8: Visual comparison on  $\times 4$  experiments of SD3. From top to bottom, from left to right, the prompts used in the four groups of examples are: 1. “Car Photograph - Ford In The Fog by Debra and Dave Vanderlaan.” 2. “Rupert Young is Sir Leon in Merlin season 5 copy.” 3. “Watchtower, Shooting Star & Milky Way, Gualala, CA.” 4. “Colorful Autumn in Mount Fuji, Japan - Lake Kawaguchiko is one of the best places in Japan to enjoy Mount Fuji scenery of maple leaves changing color giving image of those leaves framing Mount Fuji.”. Zoom-in for better view.

525  
526  
527  
528  
529  
530  
531

the application of many existing methods, such as ScaleCrafter and FouriScale. Besides, SD3 exhibits fine details in the central region but shows corrupted textures in the surrounding regions (see Figure 8). This issue with the image layout also significantly impacts the performance of other methods, such as DemoFusion. Therefore, we only compare our FreCaS with DirectInference and DemoFusion. Table 4 and Figure 8 present the quantitative and qualitative results, respectively.

532  
533  
534  
535  
536  
537  
538  
539

From Table 4, it is evident that FreCaS achieves superior performance in terms of image quality and inference speed. Specifically, FreCaS achieves the best results on FID<sub>b</sub>, FID<sub>p</sub>, IS, and IS<sub>p</sub>, and only slightly lags behind DirectInference in terms of CLIP score. Moreover, FreCaS generates a  $2048 \times 2048$  image in about 16 seconds, achieving a speed-up of  $2.42\times$  and  $3.97\times$  compared to DirectInference and DemoFusion, respectively. Figure 8 illustrates the generated images. Directly employing the pre-trained SD3 model to generate higher-resolution images, DirectInference leads to unreasonable image layout with the surrounding parts being corrupted, such as the road and trees. The results of DemoFusion exhibits strange artifacts, such as the car faces and eyes. In contrast, our FreCaS successfully maintains the natural image structure while obtaining fine details.

540  
541  
542  
543  
544  
545  
546  
547  
548  
549  
550  
551  
552  
553  
554  
555  
556  
557  
558  
559  
560  
561  
562  
563  
564  
565  
566  
567  
568  
569  
570  
571  
572  
573  
574  
575  
576  
577  
578  
579  
580  
581  
582  
583  
584  
585  
586  
587  
588  
589  
590  
591  
592  
593

Table 5: Ablation studies on  $2048 \times 2048$  generation of SDXL.

| Model | cascaded framework | FA-CFG | CA-reuse | FID $\downarrow$ | FID $_p \downarrow$ | IS $\uparrow$ | IS $_p \uparrow$ | CLIP SCORE $\uparrow$ | Latency (s) |
|-------|--------------------|--------|----------|------------------|---------------------|---------------|------------------|-----------------------|-------------|
| #1    |                    |        |          | 39.14            | 29.71               | 11.52         | 14.60            | 32.51                 | 34.10       |
| #2    | ✓                  |        |          | 17.62            | 20.49               | 17.01         | 16.54            | 33.24                 | 13.71       |
| #3    | ✓                  | ✓      |          | 16.62            | 17.91               | 17.16         | 16.82            | 33.34                 | 13.74       |
| #4    | ✓                  | ✓      | ✓        | 16.48            | 17.91               | 17.18         | 17.31            | 33.28                 | 13.84       |

Table 6: Ablation studies on  $N$  in FreCaS.

| $N$ | resolutions                                | FID $_b \downarrow$ | FID $_p \downarrow$ |
|-----|--------------------------------------------|---------------------|---------------------|
| 0   | 2048                                       | 43.83               | 29.71               |
| 1   | 1024 $\rightarrow$ 2048                    | 12.63               | 17.91               |
| 2   | 1024 $\rightarrow$ 1536 $\rightarrow$ 2048 | 41.36               | 28.68               |

Table 7: Ablation studies on  $L$  in FreCaS.

| $L$ | FID $_b \downarrow$ | FID $_p \downarrow$ |
|-----|---------------------|---------------------|
| 0   | 12.57               | 18.20               |
| 100 | 12.69               | 18.10               |
| 200 | 12.63               | 17.91               |
| 300 | 13.30               | 18.57               |
| 400 | 13.34               | 18.62               |

## G ABLATION STUDIES ON INDIVIDUAL COMPONENTS AND INFERENCE SCHEDULE

We further conduct ablation studies to verify the effectiveness of each components and the settings of inference schedule of our FreCaS.

### G.1 EFFECTIVENESS OF EACH COMPONENT

To better verify the effectiveness of each component of FreCaS, we conducted more ablation studies on our proposed cascaded framework, FA-CFG, and CA-reuse strategies. The results are shown in Table 5. One can see that our cascaded framework significantly outperforms the baseline, with a decrease of 22.52 in the FID score and a reduction of 20.39 seconds in latency. This demonstrates the high efficiency of our proposed cascaded framework. Our FA-CFG strategy improves both FID and IS scores and shows substantial improvement in FID $_p$ , demonstrating its effectiveness in generating realistic image details. The CA-reuse strategy further enhances IS $_p$ , indicating its effectiveness in improving semantic appearance. Moreover, these strategies introduce minimal additional latency.

### G.2 EXPERIMENTS ON INFERENCE SCHEDULE

In this section, we conduct experiments on the selection of  $N$  (number of additional stages) and  $L$  (the timestep of last latent in each stage). The two factors are employed to adjust the inference schedule of our FreCaS. We reports the scores of FID $_b$  and FID $_p$  by varying the two factors in Table 6 and Table 7, respectively.

**Choice of  $N$ .** From Table 6, we see that  $N = 1$  achieves an FID $_b$  score of 12.63 and an FID $_p$  score of 17.91, significantly better than  $N = 0$  and  $N = 2$  in the  $\times 4$  generation task for SDXL. This could be attributed to the fact that a larger value of  $N$  introduces more transition steps, which can lead to much information loss. Conversely, a smaller value of  $N$  reduces the effectiveness of FreCaS, degenerating it to the DirectInference method.

---

594 **Choice of  $L$ .** From Table 7, we can see that a smaller  $L$  improves  $FID_b$  score but deteriorates  $FID_p$ .  
595 This is because the details generated at lower resolutions conflict with those at higher resolutions.  
596 Thus, we set  $L$  to 200 to avoid generating excessive unwanted details in the early stages.  
597

## 598 REFERENCES

- 599  
600 Junsong Chen, Chongjian Ge, Enze Xie, Yue Wu, Lewei Yao, Xiaozhe Ren, Zhongdao Wang, Ping  
601 Luo, Huchuan Lu, and Zhenguo Li. Pixart- $\sigma$ : Weak-to-strong training of diffusion trans-  
602 former for 4k text-to-image generation. *arXiv preprint arXiv:2403.04692*, 2024.  
603  
604 Ting Chen. On the importance of noise scheduling for diffusion models. *arXiv preprint*  
605 *arXiv:2301.10972*, 2023.  
606  
607 Patrick Esser, Sumith Kulal, Andreas Blattmann, Rahim Entezari, Jonas Müller, Harry Saini, Yam  
608 Levi, Dominik Lorenz, Axel Sauer, Frederic Boesel, et al. Scaling rectified flow transformers for  
609 high-resolution image synthesis. In *Forty-first International Conference on Machine Learning*,  
610 2024.  
611  
612 Jiatao Gu, Shuangfei Zhai, Yizhe Zhang, Miguel Ángel Bautista, and Joshua M Susskind. f-dm: A  
613 multi-stage diffusion model via progressive signal transformation. In *The Eleventh International*  
614 *Conference on Learning Representations*, 2023.  
615  
616 Emiel Hoogetboom, Jonathan Heek, and Tim Salimans. simple diffusion: End-to-end diffusion for  
617 high resolution images. In *International Conference on Machine Learning*, pp. 13213–13232.  
618 PMLR, 2023.  
619  
620 Junjie Ke, Qifei Wang, Yilin Wang, Peyman Milanfar, and Feng Yang. Musiq: Multi-scale image  
621 quality transformer. In *Proceedings of the IEEE/CVF International Conference on Computer*  
622 *Vision*, pp. 5148–5157, 2021.  
623  
624 Diederik Kingma, Tim Salimans, Ben Poole, and Jonathan Ho. Variational diffusion models. *Ad-*  
625 *vances in neural information processing systems*, 34:21696–21707, 2021.  
626  
627 Anish Mittal, Rajiv Soundararajan, and Alan C Bovik. Making a “completely blind” image quality  
628 analyzer. *IEEE Signal processing letters*, 20(3):209–212, 2012.  
629  
630 Jingjing Ren, Wenbo Li, Haoyu Chen, Renjing Pei, Bin Shao, Yong Guo, Long Peng, Fenglong  
631 Song, and Lei Zhu. Ultrapixel: Advancing ultra-high-resolution image synthesis to new peaks.  
632 *arXiv preprint arXiv:2407.02158*, 2024.  
633  
634 Jiayan Teng, Wendi Zheng, Ming Ding, Wenyi Hong, Jianqiao Wangni, Zhuoyi Yang, and Jie Tang.  
635 Relay diffusion: Unifying diffusion process across resolutions for image synthesis. 2024.  
636  
637 Jianyi Wang, Kelvin CK Chan, and Chen Change Loy. Exploring clip for assessing the look and  
638 feel of images. In *Proceedings of the AAAI Conference on Artificial Intelligence*, volume 37, pp.  
639 2555–2563, 2023.  
640  
641 Xintao Wang, Liangbin Xie, Chao Dong, and Ying Shan. Real-esrgan: Training real-world blind  
642 super-resolution with pure synthetic data. In *Proceedings of the IEEE/CVF international confer-*  
643 *ence on computer vision*, pp. 1905–1914, 2021.  
644  
645 Fanghua Yu, Jinjin Gu, Zheyuan Li, Jinfan Hu, Xiangtao Kong, Xintao Wang, Jingwen He, Yu Qiao,  
646 and Chao Dong. Scaling up to excellence: Practicing model scaling for photo-realistic image  
647 restoration in the wild. In *Proceedings of the IEEE/CVF Conference on Computer Vision and*  
*Pattern Recognition*, pp. 25669–25680, 2024.
